# Supplementary material for: Nebulized antibiotics for ventilator-associated pneumonia: a systematic review and meta-analysis
Source: Springer Nature journal article supplement (doi:10.1186/s13054-015-0868-y), 2015-03-25

# Nebulized Antibiotics for ventilator-associated pneumonia: A systematic review and meta-analysis

Supplementary File

sFigure 1 - Bubble plot for metaregression

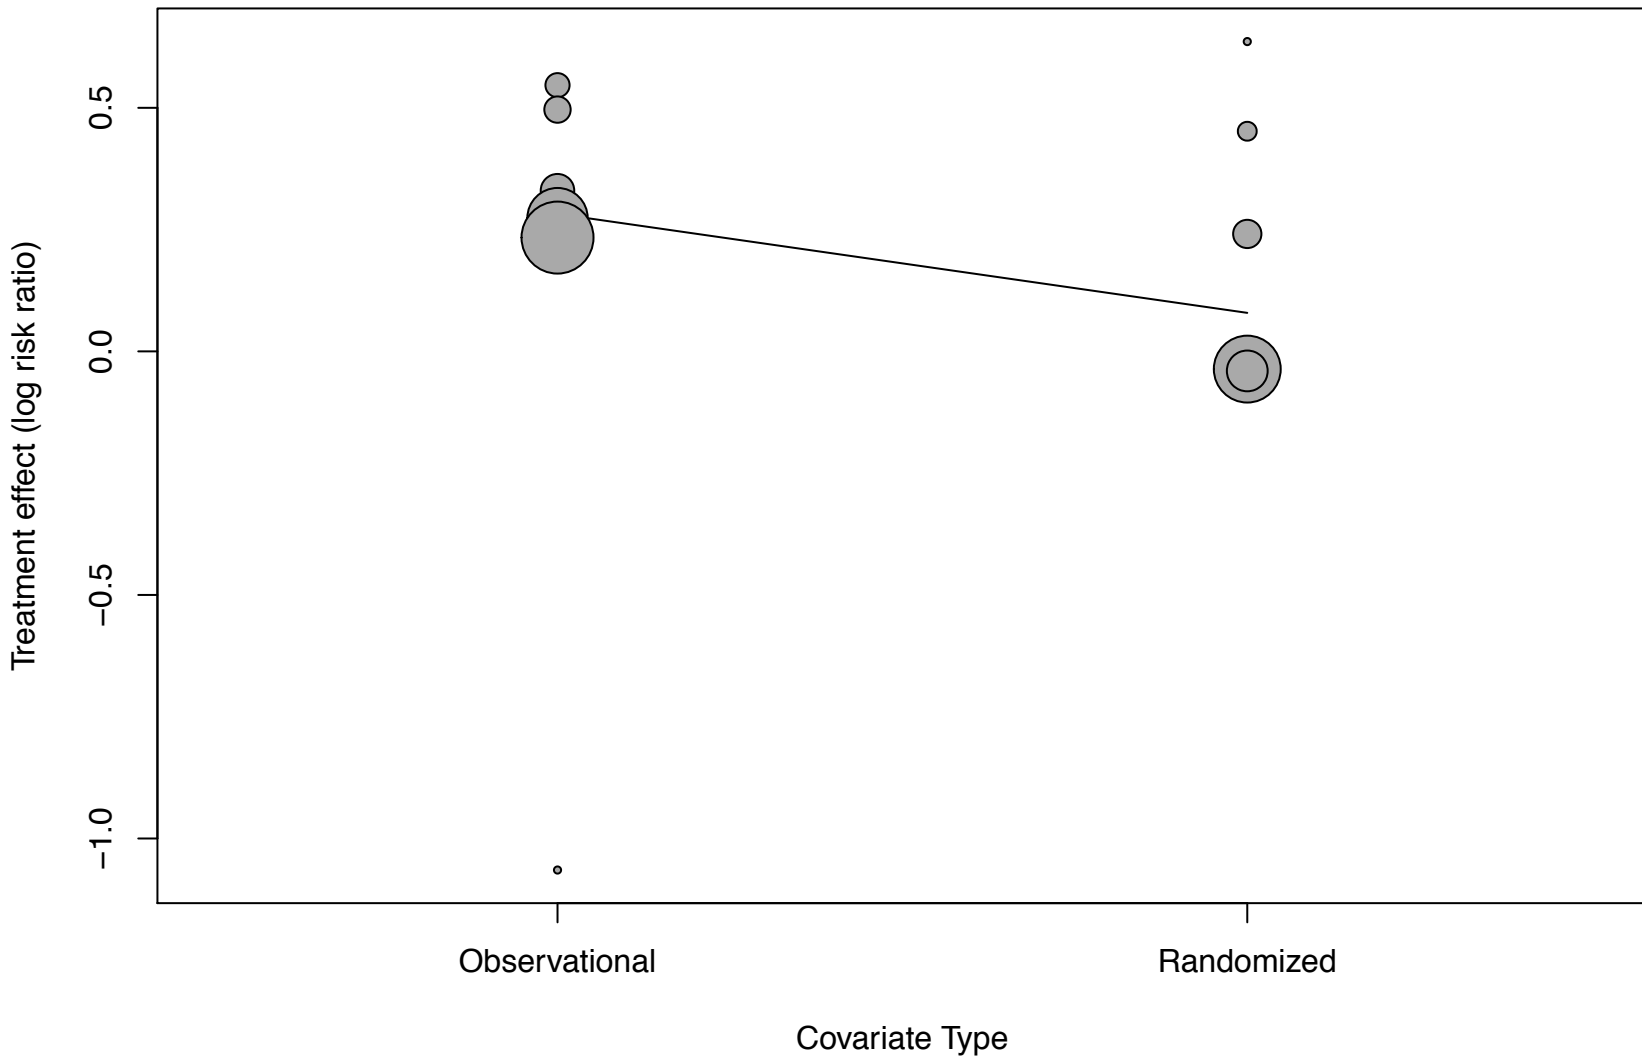

sFigure 2 - Funnel plot for clinical cure

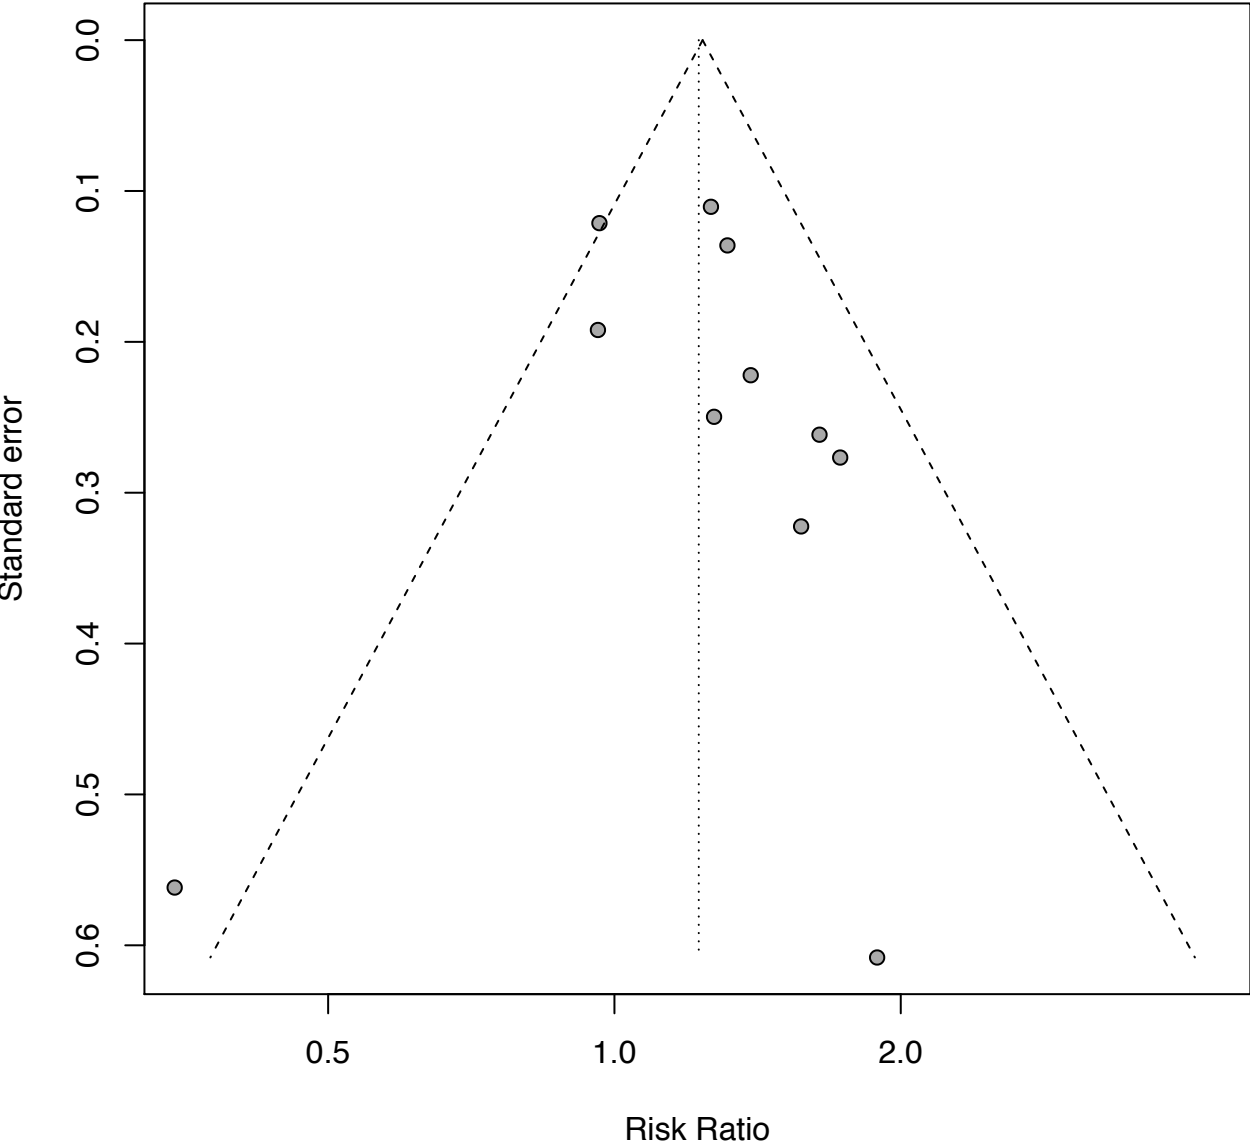

sFigure 3 - Funnel plot for microbiological cure

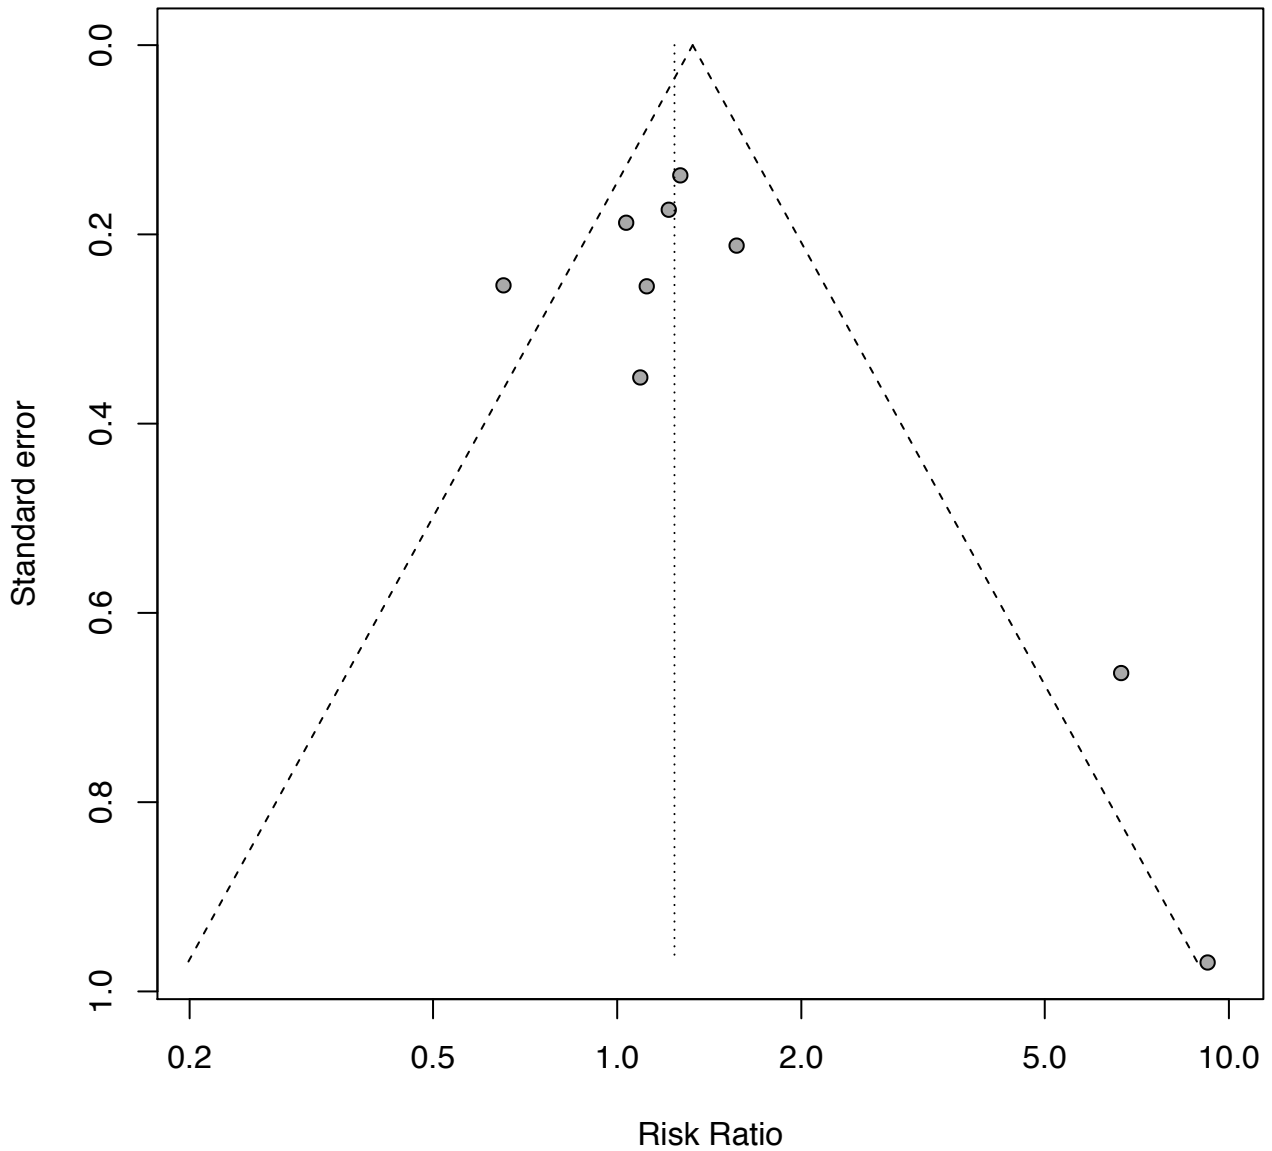

### sFigure 4 - Forest plot for Length of Mechanical Ventilation

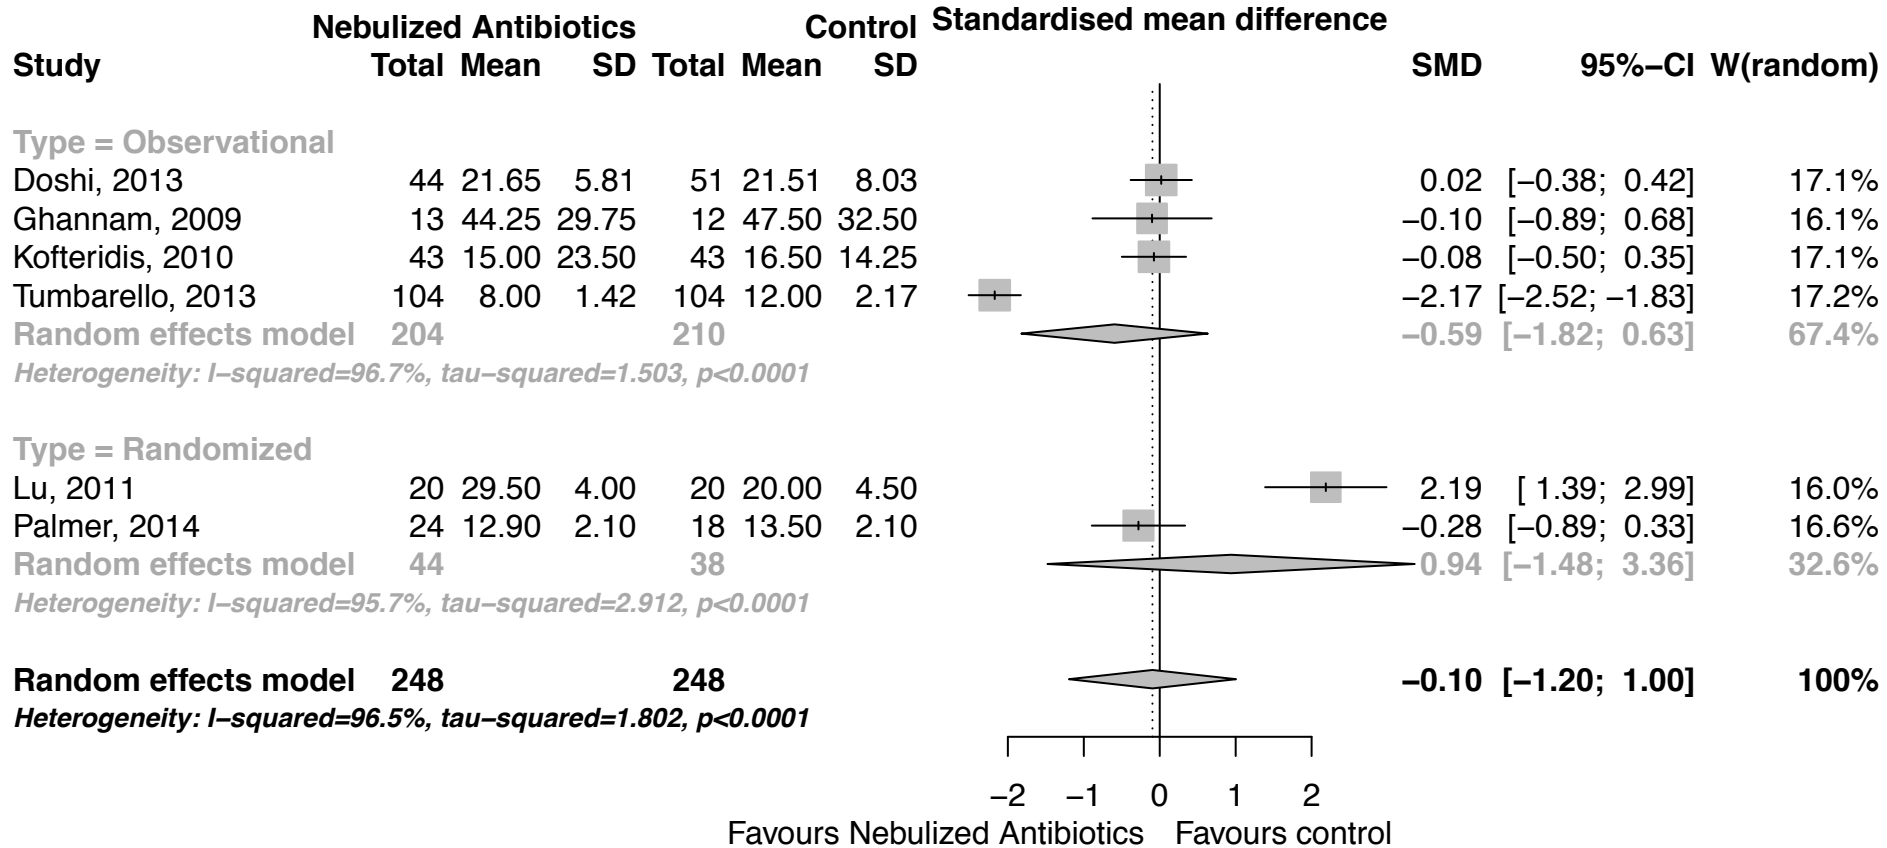

sFigure 5 - Forest plot for Length of ICU Stay

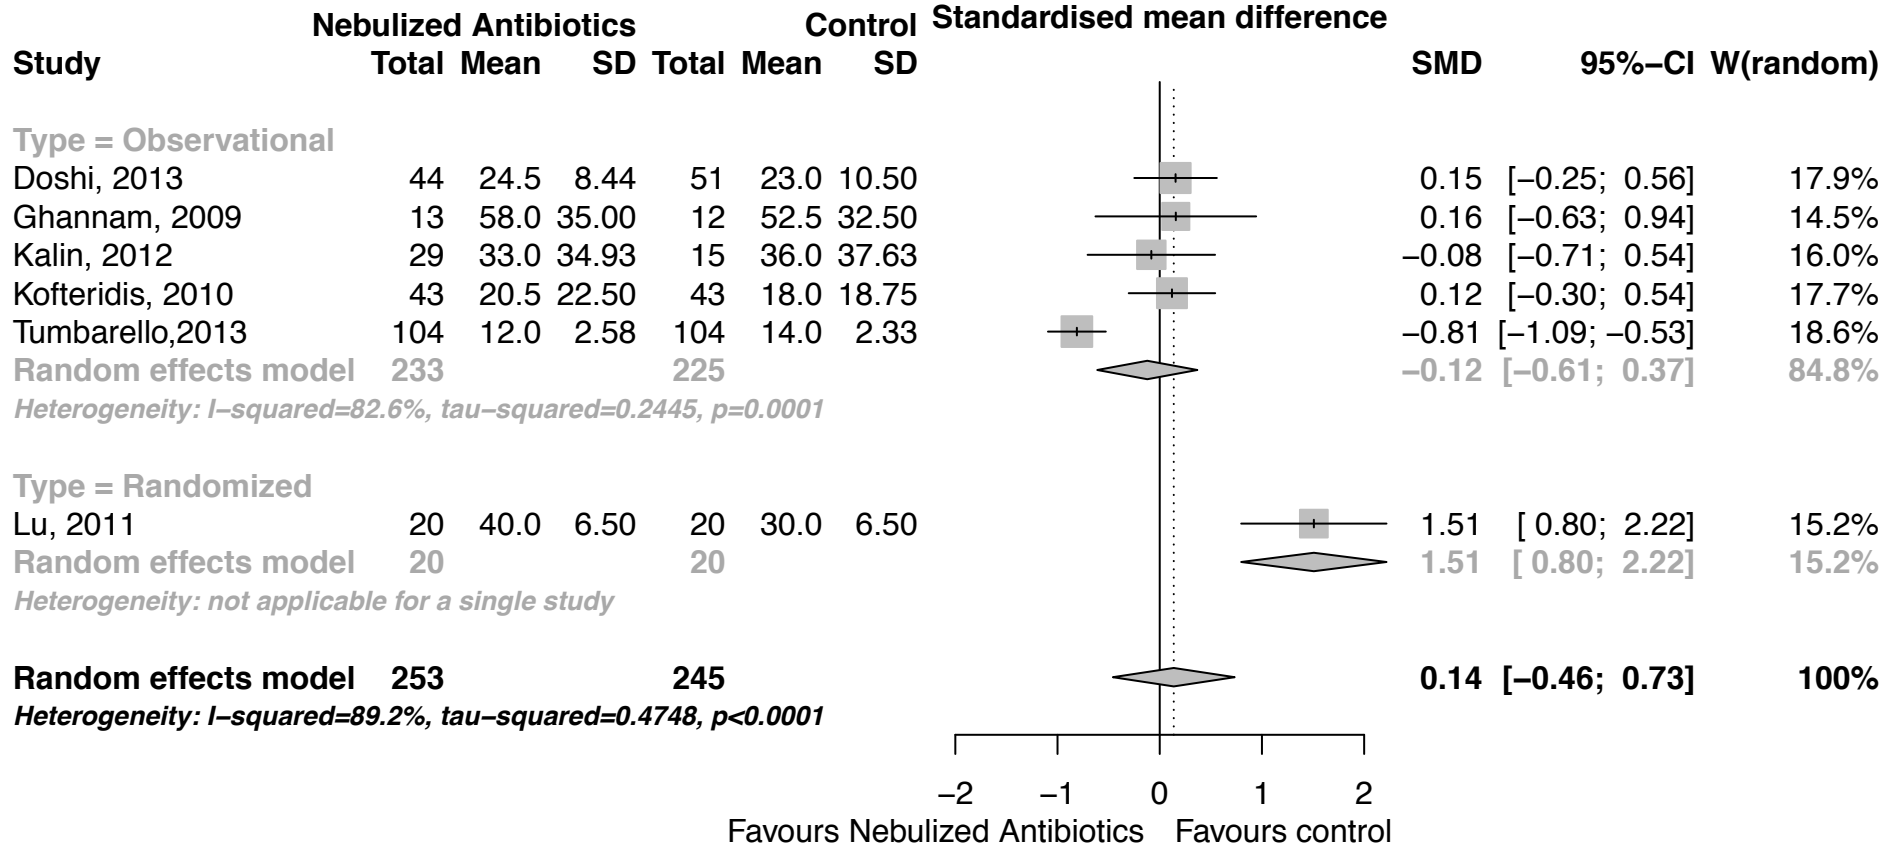

### sFigure 6 - Forest plot for Renal Injury

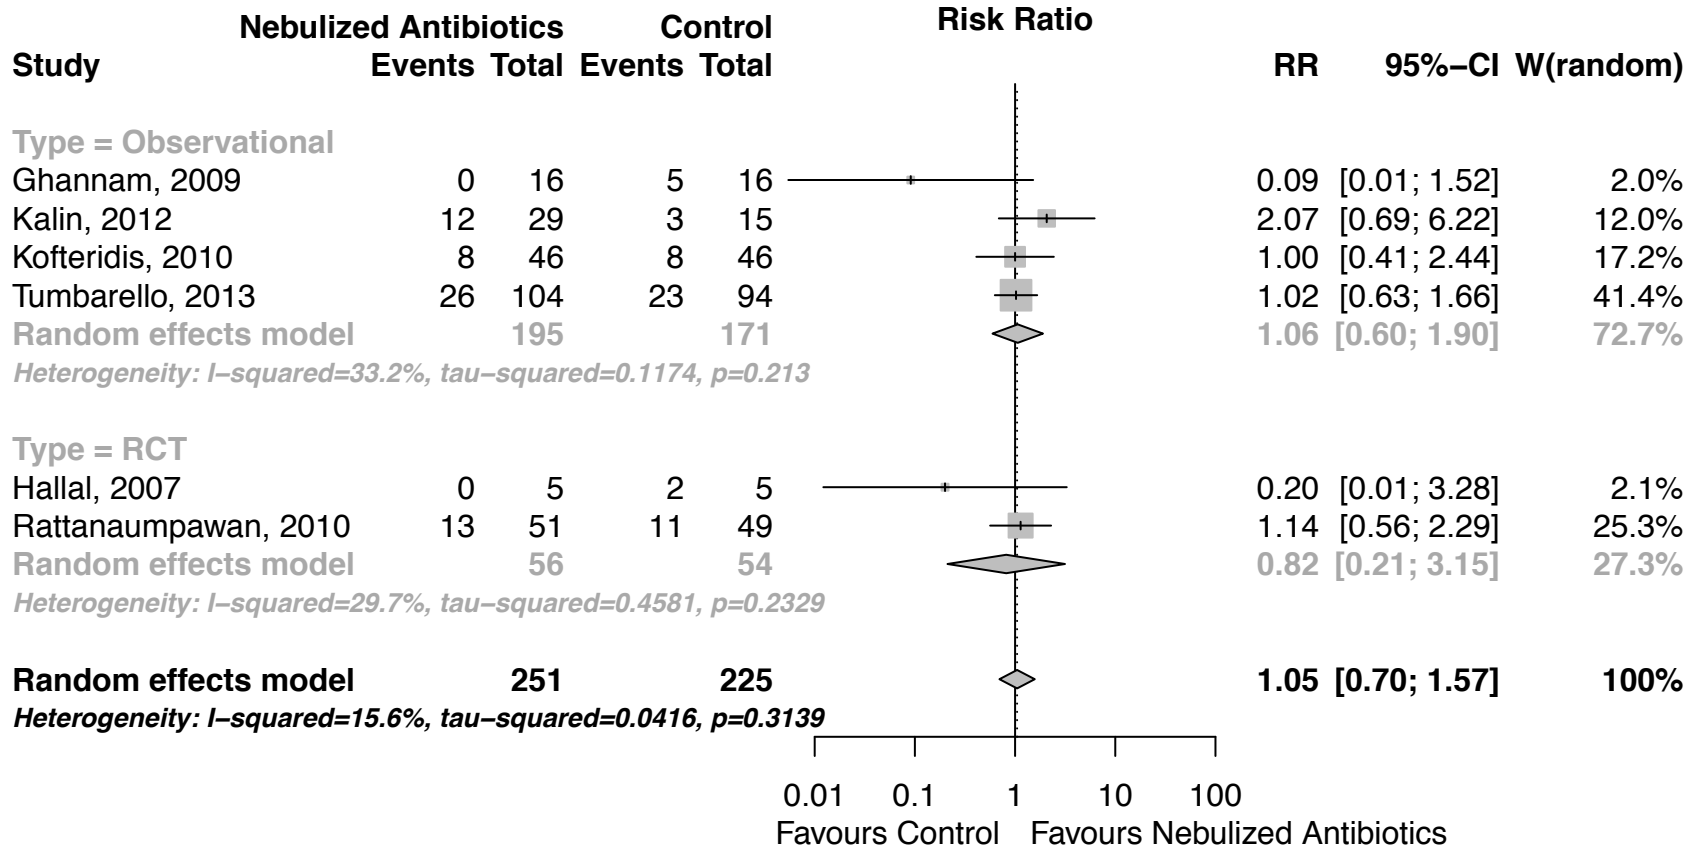

Supplement: MOESM1 [file 9780346]
